# Supplementary material
Source: PubMed Central journal article supplement (PMC3168554)
Supplement: NIHMS214683-supplement-01.pdf [file NIHMS214683-supplement-01.pdf]

## Supplemental Data

### Supplemental Figure Legends

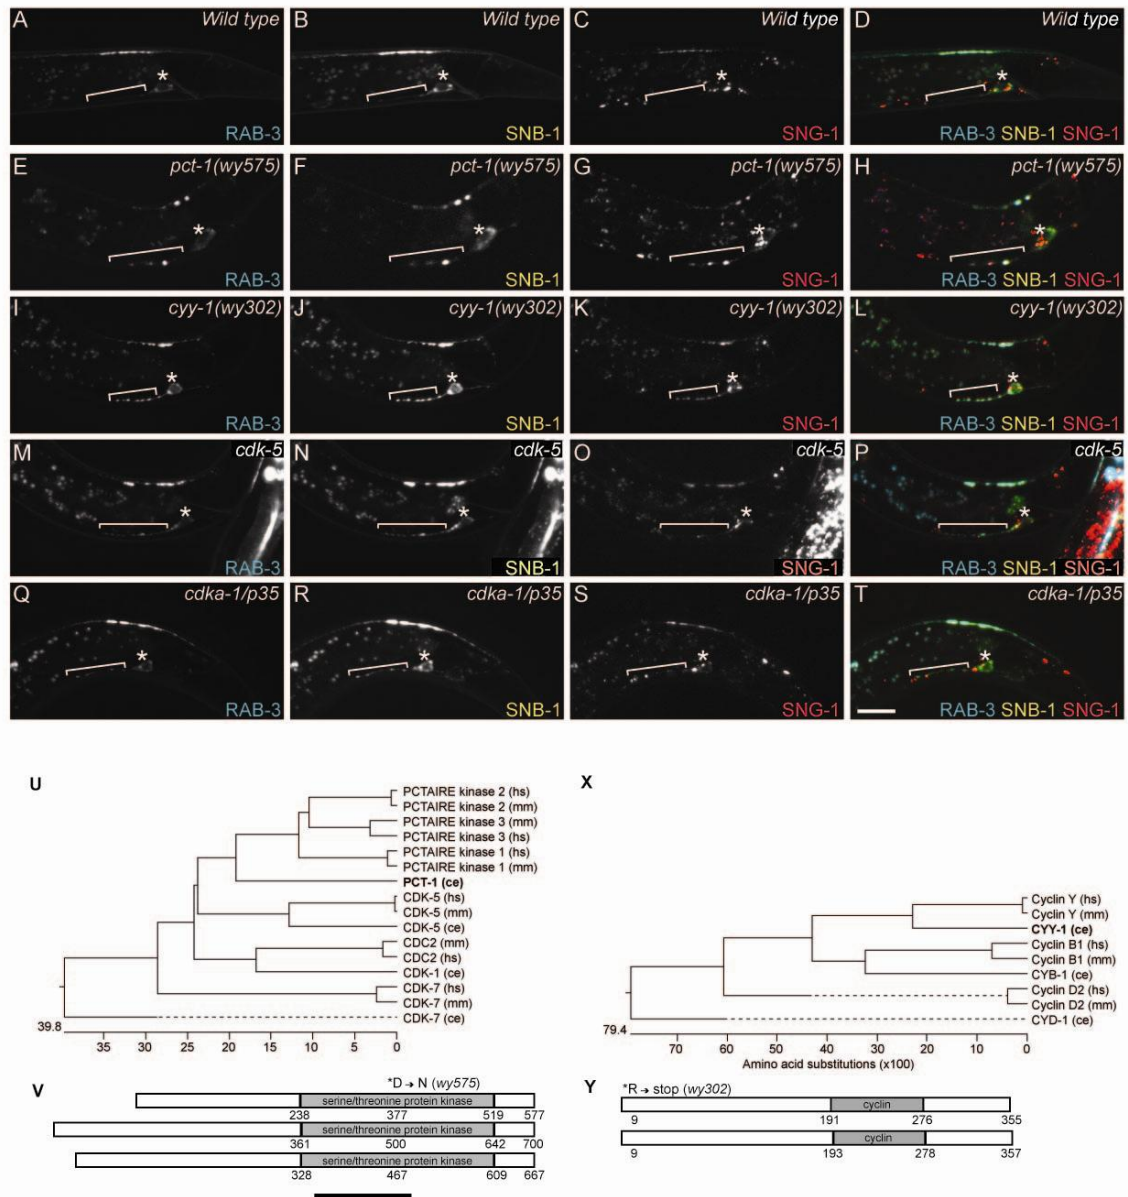

Figure S1. Mislocalization of Various Synaptic Vesicle Proteins in *wy575* and *wy302* Mutants and their Cloning, related to Figure 1.

(A-T) Synaptic vesicle proteins synaptobrevin/SNB-1, synaptogyrin/SNG-1 and RAB-3 mislocalize to the DA9 Dendrite in *pct-1(wy575)*, *cyy-1(wy302)*, *cdk-5(ok626)*, and *cdka-1/p35(tm648)* Mutants. (A-D) Wild-type young larval L1 animal co-

expressing CFP::RAB-3, SNB-1::YFP, and SNG-1::mCherry in DA9(*wyIs109*). Note that all three markers are absent from the DA9 dendrite. (E-T) CFP::RAB-3, SNB-1::YFP, and SNG-1::mCherry in *pct-1(wy575)*, *cyt-1(wy302)*, *cdk-5*, and *cdka-1/p35* mutant animals. The fluorescence in the middle of the worm is gut autofluorescence. Anterior, left and dorsal, top. Bracket, dendrite. Asterisk above cell body. Scale bar, 10 $\mu$ m.

(U-Y) Cloning of *wy575* and *wy302* mutants. (U) A balanced phylogenetic tree for PCT-1. (V) Schematic diagram of PCT-1 isoforms, *wy575* mutation, and *tm2175* deletion. (X) A balanced phylogenetic tree for CYY-1. CYB-1 and CYD-1 are *C. elegans* homologs of cyclin B and cyclin D respectively. (Y) Schematic diagram of CYY-1 isoforms and *wy302* mutation. Trees were generated using clustal analysis of full-length proteins in the software Megalign. The most closely related proteins from mouse (mm) and human (hs), and two known *C. elegans* cyclins and CDKs are included. Numbers in B and D indicate number of amino acids.

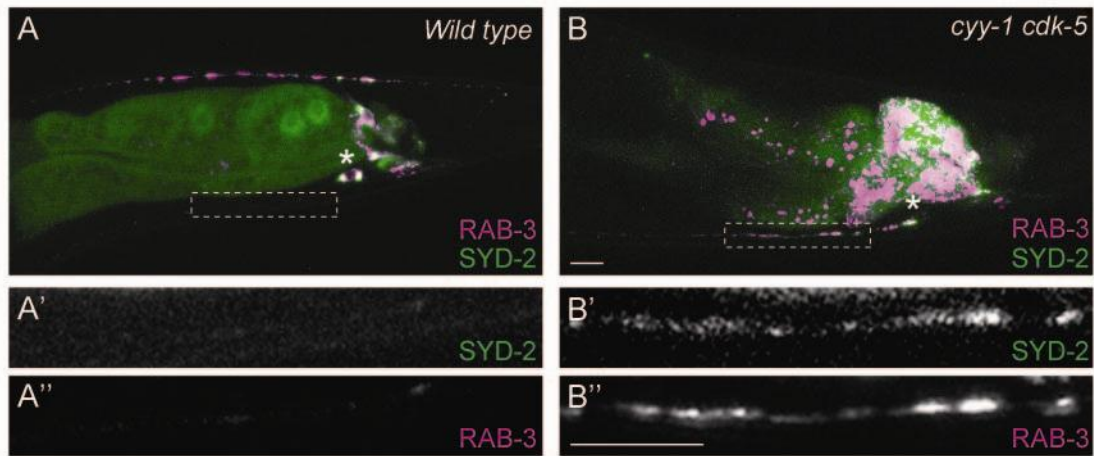

Figure S2. RAB-3 and SYD-2/Liprin- $\alpha$  Mislocalize to the DA9 Dendrite in *cyy-1 cdk-5* Mutant Animals, related to Figure 2.

(A, B) A wild-type (A) or *cyy-1 cdk-5* mutant animal (B) co-expressing GFP::RAB-3 and mCherry::SYD-2/liprin- $\alpha$ (*wyEx2055*) in DA9. (A'-B', A''-B'') Higher magnification micrographs of the corresponding dotted boxes. Asterisk above cell body. Scale bar, 10 $\mu$ m.

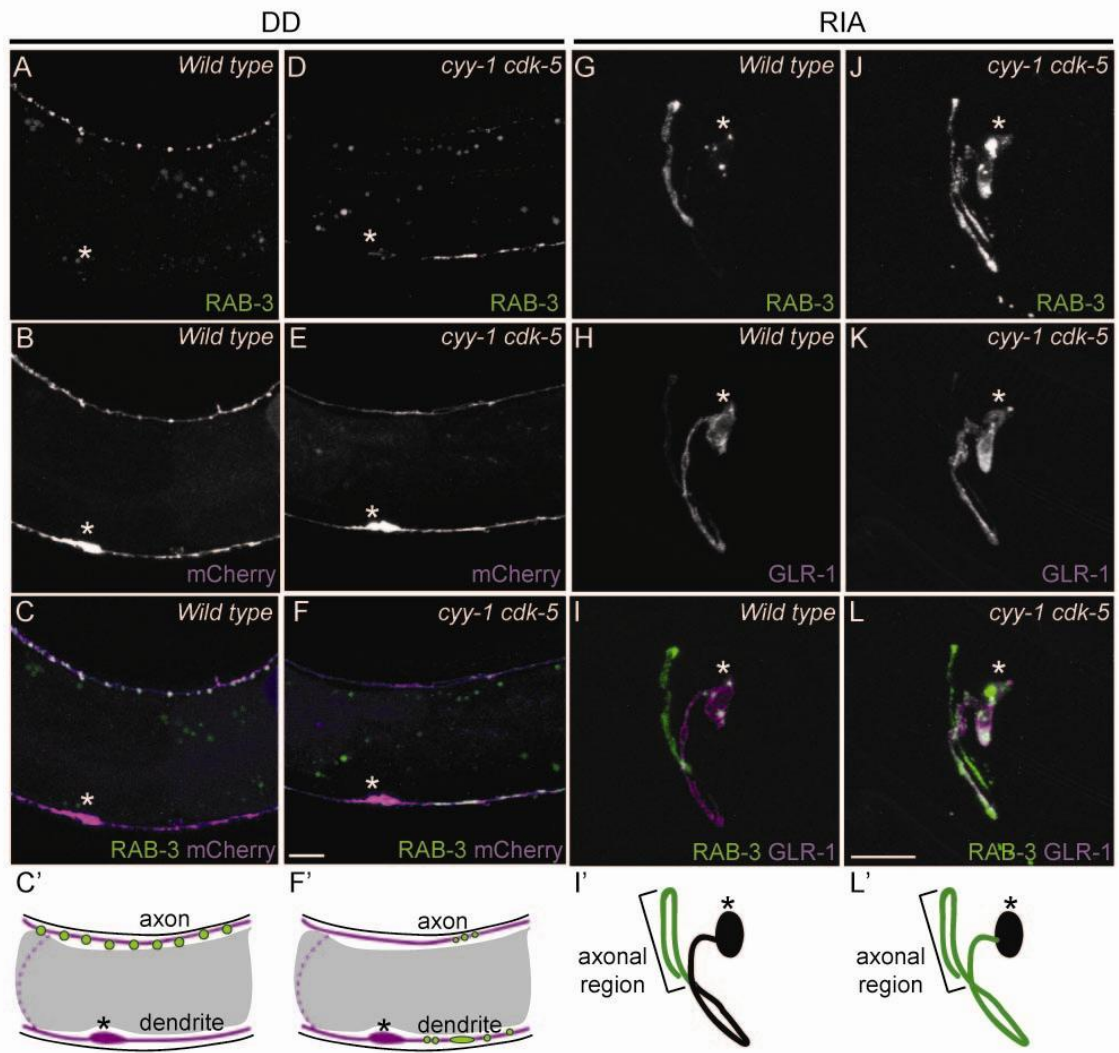

Figure S3. Synaptic Vesicle-Associated RAB-3 Mislocalizes to the Dendrite in DD and RIA Neurons in *cyy-1 cdk-5* Mutant Animals, related to Figure 3.

(A-F) Micrographs (A-C) and schematic diagram (C') of a wild-type adult animal co-expressing GFP::RAB-3 and mCherry in DD neurons(*wyIs202*). (D-F') GFP::RAB-3 and mCherry in a *cyy-1 cdk-5* mutant animal. (G-L') Micrographs and schematic diagram of wild-type (G-I') or *cyy-1 cdk-5* mutant animals (J-L') co-expressing mcherry::RAB-3 (green) and postsynaptic receptor GLR-1::GFP (purple) in

RIA(*wyIs93*). GLR-1 is unaffected while RAB-3 is present in the postsynaptic domain of RIA. Asterisk above cell body. Scale bar, 10 $\mu$ m.

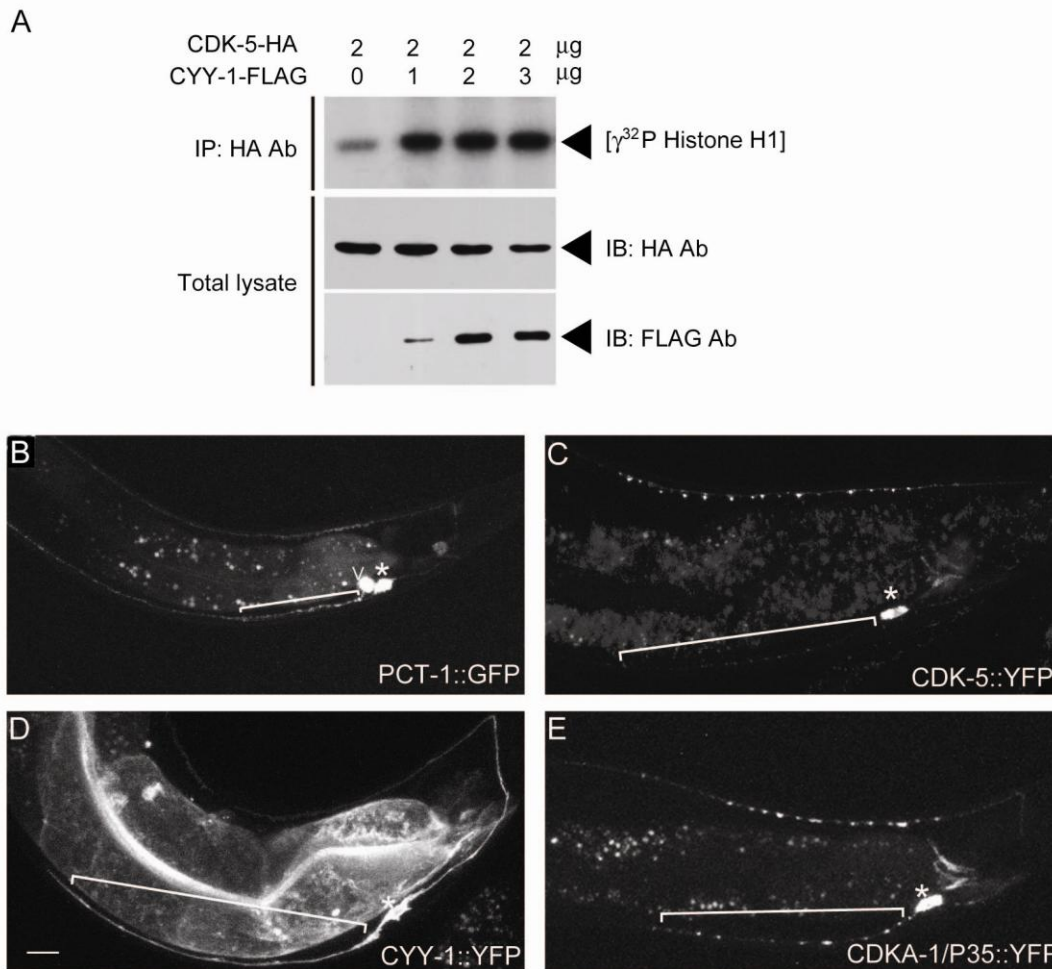

Figure S4. CYY-1 can activate CDK-5 and Subcellular localization of PCT-1, CYY-1, CDK-5, and CDKA-1/p35, related to Figure 4.

(A) *C. elegans* CDK-5-HA and CYY-1-FLAG were co-expressed in HEK 293T cells as indicated. Expression of CDK-5 alone exhibits no kinase activity, while co-expression with CYY-1 significantly increases the kinase activity of CDK-5. Lysate was immunoprecipitated with HA antibody and then subjected to kinase assay using Histone H1 protein as a substrate.

(B) PCT-1::GFP expressed in DA9 and VA12 neurons (*wyEx2774*). (C) CDK-5::YFP expressed in DA9 (*wyEx2160*). (D) CYY-1::YFP expressed in DA9 (*wyEx2789*). (E) CDKA-1/p35::YFP expressed in DA9 (*wyEx2460*).

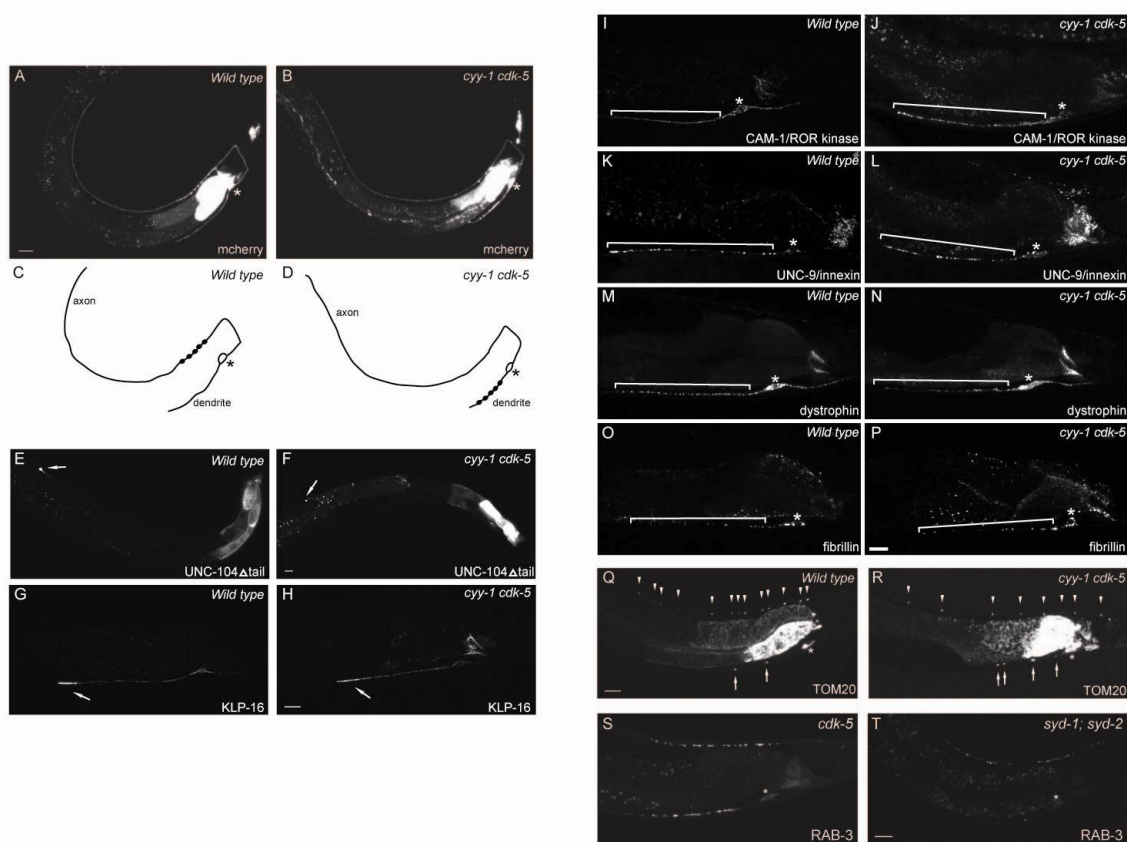

Figure S5. Many Aspects of Subcellular Specifications are Normal in *cyy-1 cdk-5* Mutants, related to Figure 5.

(A-D) DA9 axon and dendrite projection is normal in *cyy-1 cdk-5* mutant animals. Wild-type (A) or *cyy-1 cdk-5* (B) mutant animals expressing mCherry(*wyEx1902*) in DA9. (C, D) Schematic diagrams of DA9 guidance and morphology. (E-H) The anterograde motor UNC-104/KIF1A localizes to the tip of the dorsal axon while the minus-end Motor KLP-16/KIFC3 is enriched at the tip of the DA9 dendrite in wild-type and *cyy-1 cdk-5* Mutant Animals. This pattern is consistent with a mixed MT polarity in dendrite, where the preferred orientation is with their minus-ends oriented toward the tip of the dendrite. (E, F) Wild-type or *cyy-1 cdk-5* mutant



animals expressing UNC-104  $\Delta$ tail (1-389)::GFP(*wyEx2992*) in DA9. (G, H) Wild-type or *cyt-1 cdk-5* mutant animals expressing KLP-16::YFP(*wyEx3128*) in DA9. Arrow, accumulation of motor protein. (I-P) Four dendritic proteins localize appropriately in *cyt-1 cdk-5* Mutant Animals. Animals expressing CAM-1::YFP (I, J, *wyEx403*), UNC-9::YFP (K, L, *wyEx1054*), DYS-1::YFP (M, N, *wyEx2430*), or fibrillin::YFP (O, P, *wyEx2396*) in DA9. (Q-R) TOM20, a Subunit of the Mitochondrial Translocase Complex is Still Present in the Axon in *cyt-1 cdk-5* Mutant Animals. A wild-type (Q) or *cyt-1 cdk-5* mutant animal (R) expressing TOM20::YFP(*wyEx2406*) in DA9. Arrowheads, axonal TOM20 puncta. Arrows, dendritic TOM20 puncta. (S-T) Presynaptic assembly mutants have a different phenotype when compared to *cdk-5* Mutant Animals. A *cdk-5* (S) or *syd-1(ju82); syd-2/liprin- $\alpha$ (wy5)* mutant animal (T) expressing GFP:RAB-3(*wyIs85*) in DA9. Asterisk indicates cell body. Scale bars, 10 $\mu$ m.

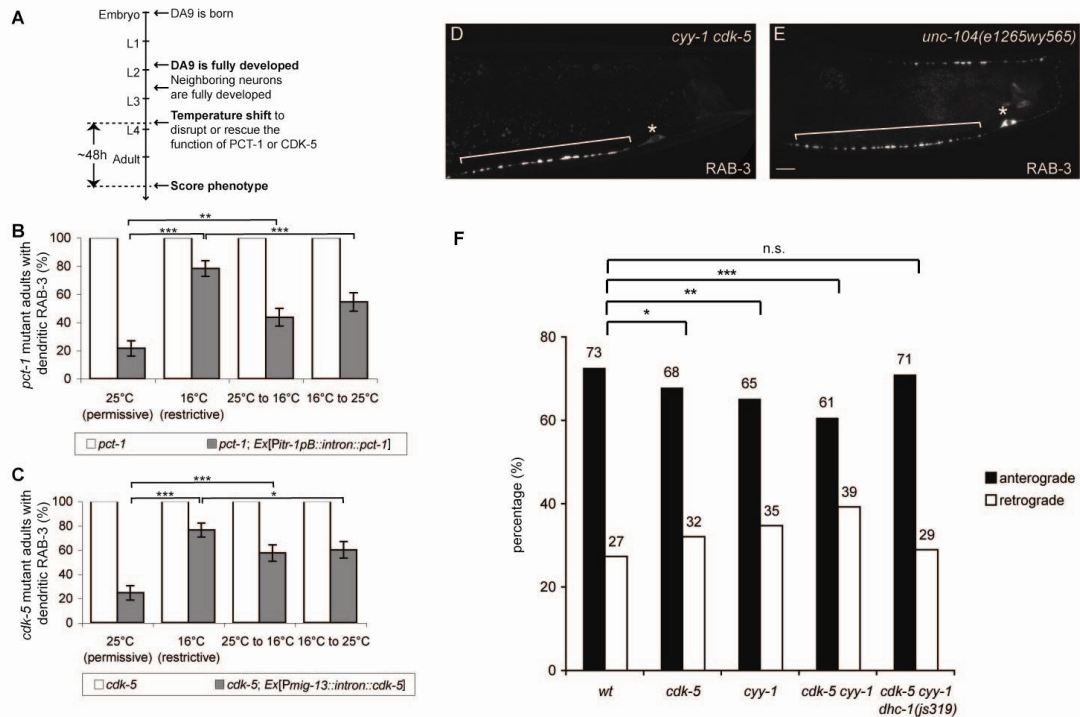

Figure S6. PCT-1 and CDK-5 Maintain the Balance between Anterograde and Retrograde SVP Transport, related to Figure 6.

(A-C) PCT-1 and CDK-5 are required to maintain the polarized localization of GFP::RAB-3. (A) Experimental time line. (B, C) *pct-1* (white columns in B) or *cdk-5* (white columns in C) mutant animals have mislocalized RAB3 in dendrites at 16-25°C. The mislocalization defect of *pct-1* or *cdk-5* mutant animals respectively is rescued at 25 °C, not 16 °C in early or later stage by  $P_{itr-1pB}::intron::pct-1$  (black columns in B, *wyEx2904*) or  $P_{mig-13}::intron::cdk-5$  (black columns in C, *wyEx2923*) transgenes. Error bars represent standard error of proportion.  $n > 100$ . \*\*\*,  $p < 0.0005$ . \*\*,  $p < 0.005$ . \*,  $p < 0.05$ .  $\chi^2$  test.

(D-E) *unc-104/kif1a(e1265wy565)* mutants have a weaker mislocalization defect than *cyt-1 cdk-5* double mutants. A *cyt-1 cdk-5* double mutant animal (D) or *unc-104/kif1a(e1265wy565)* mutant animal (E) expressing GFP::RAB-3(*wyIs85*). Asterisk below cell body. Scale bar, 10 $\mu$ m.

(F) Percentage of total SVPs moving in the anterograde (black) or retrograde (white) direction. While the balance between anterograde and retrograde transport is most dramatically affected in the *cdk-5 cyt-1* double mutant, either single mutant displays an intermediate phenotype significantly different from *wild type* (*wt*). The *dhc-1(js319)* allele rescues the imbalance in SVP transport in the *cdk-5 cyt-1* mutant background. \*\*\*,  $p < 0.0005$ ; \*\*,  $p < 0.005$ ; \*,  $p < 0.05$ , Fisher's exact test.

## Supplemental Methods

### Constructs and Transgenic Worms.

*wyEx2288,9, 2776,7*: a AscI-KpnI PCR fragment containing the *cyt-1* genomic sequence was subcloned into *Pmig-13::yfp::unc-5 3'utr* pSM to make *Pmig-13::cyt-1 stop::yfp::unc-5 3'utr*. A SphI-AscI PCR fragment containing *Pitr-1 pB* was subcloned into *cyt-1 stop::yfp::unc-5 3'utr* pSM. *Pitr-1 pB::cyt-1 stop::yfp::unc-5 3'utr* was injected at 10ng  $\mu\text{l}^{-1}$  (*wyEx2288,9*) or 20ng  $\mu\text{l}^{-1}$  (*wyEx2276,7*) with *Podr-1::gfp* at 20ng  $\mu\text{l}^{-1}$  into *cyt-1;wyIs85* or *pct-1;wyIs85* animals. The four arrays are separate lines obtained from two injections.

*Pitr-1 pB* primers 5' GAAAGGGGCGCCATCTATTCCAGAGTTCGTTCCCGAGC and 3' CTTTCCGGCGCGCCCAATTCGTGTGCTTCCACCACCAC

*cyt-1* primers 5' GAAAGGGGCGCGCCATGGGAAATTCATCGTGTGTTGTCTG and 3' GAAAGGGGTACCCTACGAGAGAACAGCCGGATG

*wyEx2506,7*: an AscI-KpnI PCR fragment containing the *pct-1c* genomic sequence was subcloned into *Pmig-13 delta* pSM vector to make *Pmig-13::pct-1c::unc-54 3'utr*. This construct was injected with *Podr-1::gfp* (both at 20ng  $\mu\text{l}^{-1}$ ) into *wyIs85* animals. The two arrays are separate lines obtained from one injection. *pct-1c* primers 5'

GAAAGGGGCGCGCCGTATACTTTCTCATTTCATCG and 3'

GAAAGGGGTACCGCATATTATCATTCTG

*wyEx2706*: an AscI-KpnI PCR fragment containing the *pct-1a* cDNA obtained from the ORFeome project (<http://worfdb.dfci.harvard.edu/>) was subcloned into *Pitr-1*

*pB::yfp::unc-5 3'utr* pSM to make *Pitr-1 pB::pct-1a stop::yfp::unc-5 3'utr*. This

construct was injected at 40ng  $\mu\text{l}^{-1}$  with *Podr-1::gfp* at 20ng  $\mu\text{l}^{-1}$  into *wyIs85* animals. *pct-1a* primers 5' GAAAGGGGCGCGCCATGAAGAAGCTTAAACG and 3'

GAAAGGGGTACCTAAGTGTGATGACTCGAAT

*wyEx2904, 2923*: An AscI PCR fragment obtained from pAC13, a generous gift from M.

Chalfie, containing *mec-2 intron9* was subcloned into *Pitr-1 pB::pct-1a::unc-5*

*3'utr(wyEx2904)* or *Pmig-13::cdk-5::unc-54 3'utr(wyEx2923)*. Both plasmids were

injected at 10ng  $\mu\text{l}^{-1}$  with *Podr-1::gfp* at 20ng  $\mu\text{l}^{-1}$  into *pct-1; wyIs85* or *cdk-5; wyIs85*

mutants. The two arrays are separate lines obtained from one injection. *mec-2 intron9*

primers 5' GAAAGGGGCGCGCCCACCGCCTAAAGTGTAAGTTTTTC and 3'

GAAAGGGGCGCGCCGACGGTGGCTCCTCACTGAAAAC

*wyEx2624,6*: The *cdk-5* entry clone was obtained from the ORFeome project

(<http://worfdb.dfci.harvard.edu/>) and cloned into the destination vector *Pmig-*

*13::gateway::yfp* (Klassen and Shen, 2007) and *Pmig-13::gfp::gateway* using the gateway

strategy with LR clonase (Invitrogen) to make *Pmig-13::cdk-5::yfp* and *Pmig-*

*13::gfp::cdk-5*. The AscI-Kpn-1 fragment containing *cdk-5* was subcloned into *mig-*

*13::unc-54 3'utr* pSM and the resulting plasmid was injected at 5ng  $\mu\text{l}^{-1}$  with *Podr-1::gfp*

at 20ng  $\mu\text{l}^{-1}$  into *cdk-5; wyIs85*. The two arrays are separate lines obtained from one

injection.

*wyEx2286,7*: *Pitr-1::cdk-5::unc-54 3'utr* was injected at 10ng  $\mu\text{l}^{-1}$  with *Podr-1::gfp* at

20ng  $\mu\text{l}^{-1}$  into *cdk-5; wyIs85* animals. The two arrays are separate lines obtained from one

injection.

*wyEx2860,1*: a AscI-KpnI PCR fragment containing the *cdka-1* genomic sequence was

subcloned into *Pitr-1 pB::yfp::unc-5 3'utr* pSM and *Pitr-1 pB::cdka-1 stop::yfp::unc-5*

3'utr was injected at 10ng  $\mu\text{l}^{-1}$  with *Podr-1::gfp* at 20ng  $\mu\text{l}^{-1}$  into *cdka-1; wyIs85* animals.

The two arrays are separate lines obtained from one injection. *cdka-1* primers 5'

GAAAGGGGCGCGCCATGGGCGCAAATTTGACGTC and 3'

GAAAGGGGTACCTCATTTCGGAACCTGAACAATGCTTG

*wyEx2774, 2160, 2789, 2460: Pmig-13::pct-1c::gfp* (cloned as *wyEx2506, 20ng  $\mu\text{l}^{-1}$* ) (*wyEx2774*), *Pitr-1pB::cdk-5::yfp* (cloned as *wyEx2624, 50ng  $\mu\text{l}^{-1}$* ) (*wyEx2160*), *Pitr-1pB::cyy-1::yfp* (cloned as *wyEx2288, 50ng  $\mu\text{l}^{-1}$* ) (co-inject with *Pitr-1pB::mCherry, 20ng  $\mu\text{l}^{-1}$* ), *Pitr-1pB::cdka-1/p35::yfp* (cloned as *wyEx2860, 15ng  $\mu\text{l}^{-1}$* ) were injected with *Podr-1::gfp* at 20ng  $\mu\text{l}^{-1}$  into wild-type animals.

*wyEx2694,5*: The *unc-104* entry clone was kindly provided by Dieter Klopfenstein and inserted into the destination vector *Pmig-13::gateway* to make *Pmig-13::unc-104*. The resulting plasmid was injected at 50ng  $\mu\text{l}^{-1}$  with *Podr-1::gfp* at 20ng  $\mu\text{l}^{-1}$  into *cyy-1 cdk-5; wyIs85* animals. The two arrays are separate lines obtained from one injection.

*wyEx2992*: a Nhe1-Kpn1 PCR fragment containing *unc-104(1-389)* sequence was subclone into *Pitr-1pB::GFP::unc-54 3'UTR pSM* to make *Pitr-1 pB::unc-104(1-389)::gfp*. This construct was injected at 20 ng  $\mu\text{l}^{-1}$  with *Podr-1::gfp* at 20ng  $\mu\text{l}^{-1}$  into wild-type animals. *unc-104(1-389)* primers 5'

GAAAGGGCTAGCATGTCATCGGTAAAGTAGCTG and 3'

GAAAGGGGTACCGTCTCCTGTACGTCTGTGACA

*wyEx3128*: The *klp-16* entry clone was inserted into the destination vector *Pitr-1 pB::gateway::yfp* to make *Pitr-1 pB::klp-16::yfp*. The resulting plasmid was injected at 10ng  $\mu\text{l}^{-1}$  with *Podr-1::gfp* at 20ng  $\mu\text{l}^{-1}$  into wild-type animals.

*wyEx2793*: A SphI-AscI fragment containing *Pmig-13* was subcloned into *gfp::rab-3::unc-54 3'utr* pSM and the resulting *Pmig-13::gfp::rab-3* construct was injected at  $4\text{ng } \mu\text{l}^{-1}$  with *Podr-1::gfp* at  $40\text{ng } \mu\text{l}^{-1}$  into wild-type animals.

### **Electron Microscopy.**

Ten animals were placed in a type-A 100 $\mu\text{m}$ -deep specimen carrier (BAL-TEC) filled with bacteria and then capped with the flat side of a type-B specimen carrier. The specimens were frozen instantaneously in a BAL-TEC HPM 010 high-pressure freezer (BAL-TEC, Liechtenstein) and transferred into a cryovial containing anhydrous acetone with 1% osmium tetroxide, 0.1% uranyl acetate, and 1% water. Freeze-substitutions were carried out in a Leica EM AFS2 with the following program: 48 hours at  $-90^{\circ}\text{C}$ ,  $5^{\circ}\text{C}/\text{hour}$  to  $-20^{\circ}\text{C}$  (14 hours), 16 hours at  $-20^{\circ}\text{C}$ , and  $10^{\circ}\text{C}/\text{hour}$  to  $20^{\circ}\text{C}$  (4 hours). The animals were then infiltrated and embedded in epon-araldite. 200-300 contiguous ultra-thin (33nm) sections were collected from regions around the anterior reflex of the gonad of multiple animals using an Leica Ultra 6 microtome. The sections were then stained with 2.5% uranyl acetate for 4 minutes and imaged on a Hitachi H-7100 electron microscope equipped with a GATAN orius CCD camera.

### **Temperature Shift Experiments.**

*pct-1(tm2175);wyIs85*; *wyEx2904(Pitr-1pB::intron::pct-1)* and *pct-1(tm2175);wyIs85* (Figure S6B) or *cdk-5(ok626); wyIs85*; *wyEx2904(Pitr-1pB::intron::cdk-5)* and *cdk-5(ok626); wyIs85* (Figure S6C) animals were cultured at  $16^{\circ}\text{C}$  or  $25^{\circ}\text{C}$  for multiple generations before being shifted to a different temperature. These animals in the L3 and

early L4 larval stages were placed at 16°C for three days or at 25°C for two days before the phenotype was analyzed. Scoring was done in gravid adults.

### **Co-immunoprecipitation assay**

The cells were lysed in lysis buffer (in mM) (HEPES, pH 7.4, 25; MgCl<sub>2</sub>, 1; NaCl, 300; EDTA, 1; EGTA, 1) supplemented with 0.5% Nonidet P-40 and various protease inhibitors. The cell lysates were then incubated with anti-FLAG (Sigma) or anti-HA (Roche) antibodies (2 µg) at 4 °C for 2 hours, followed by incubation with 40 µl of protein G sepharose (GE Healthcare) at 4 °C for 1 hour. The samples were washed with lysis buffer and resuspended in SDS sample buffer. Proteins were co-immunoprecipitated and detected using Western blot analysis

### **In vitro kinase assay.**

The cells were lysed using lysis buffer (HEPES, pH 7.4, 25mM; EGTA, 1mM; DTT, 1mM) supplemented with 0.2% Nonidet P-40 and various protease inhibitors.

The kinase assay was performed at 30 °C for 30 min in kinase buffer (20 mM MOPS, pH 7.4, 15 mM MgCl<sub>2</sub>, 100 µM ATP) containing 1 µCi of [ $\gamma$ -<sup>32</sup>P] ATP (PerkinElmer).

Phosphorylated proteins were separated by 15% SDS-PAGE and visualized by autoradiography.
